# Supplementary material
Source: MDPI journal article supplement (https://www.mdpi.com/2073-4433/10/8/478)
Supplement: s1 [file s1]

Article

# Wintertime Variations of Gaseous Atmospheric Constituents in Bucharest Peri-Urban Area

Cristina Marin <sup>1,2</sup> , Luminița Mărmureanu <sup>1,\*</sup> , Cristian Radu <sup>1</sup>, Alexandru Dandocsi <sup>1,2</sup>, Cristina Stan <sup>2</sup>, Flori Țoancă <sup>1</sup>, Liliana Preda <sup>2</sup> and Bogdan Antonescu <sup>1,3</sup> 

<sup>1</sup> National Institute of Research and Development for Optoelectronics INOE 2000, Str. Atomîștilor 409, Măgurele, Ilfov, RO077125, Romania

<sup>2</sup> Politehnica University of Bucharest, Department of Physics, Str. Spl. Independenței 313, București, RO060042, Romania

<sup>3</sup> University of Bucharest, Faculty of Physics, București, RO077125, Romania

\* Correspondence: mluminita@inoe.ro

Version August 19, 2019 submitted to Atmosphere

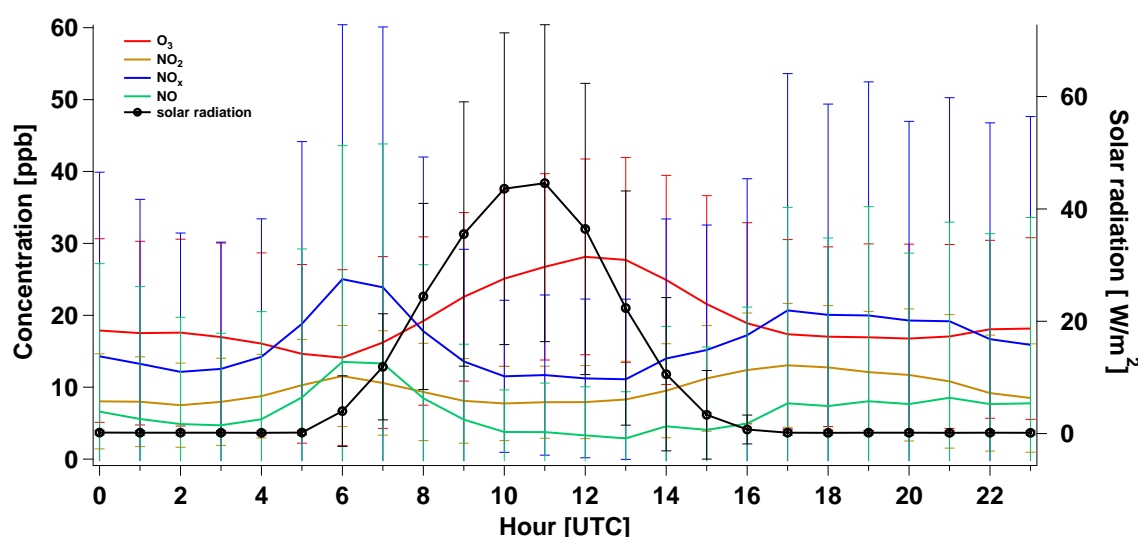

**Figure 1.** Diurnal trend for ozone (red line), nitrogen dioxide (orange line), nitric oxide (green line), nitrogen oxides (blue line) and solar radiation (black line), computed for the cold season between 1 December 2017–4 March 2018. The vertical error bars represent the standard deviation from the mean value.

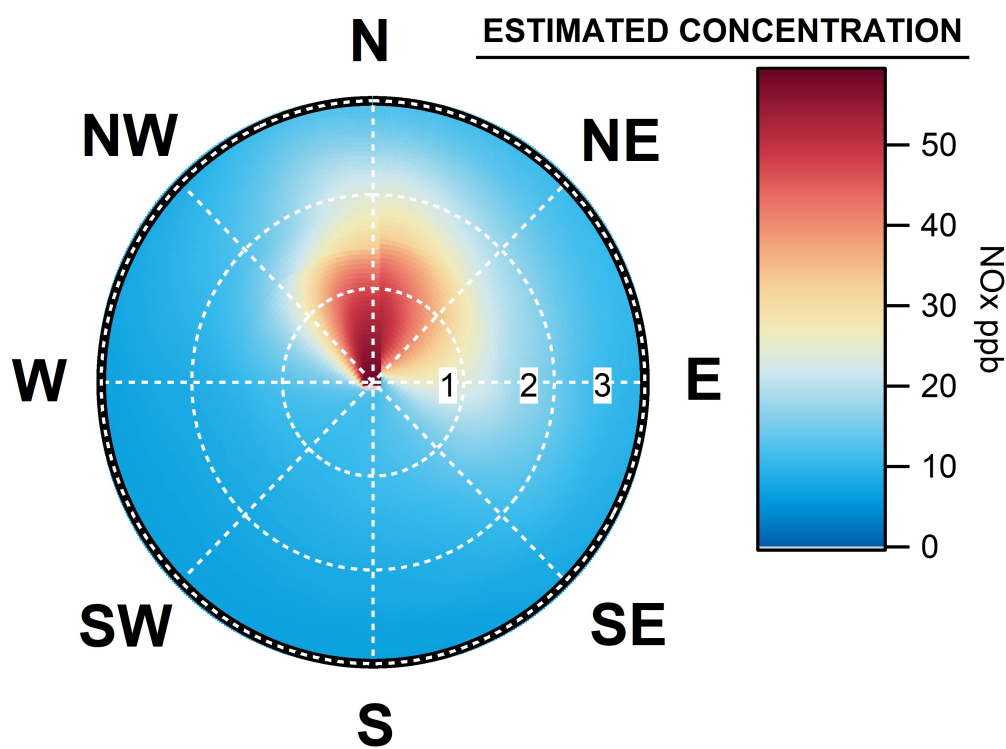

**Figure 2.** Source estimation for NO<sub>x</sub> (ppb, shaded according to the scale)

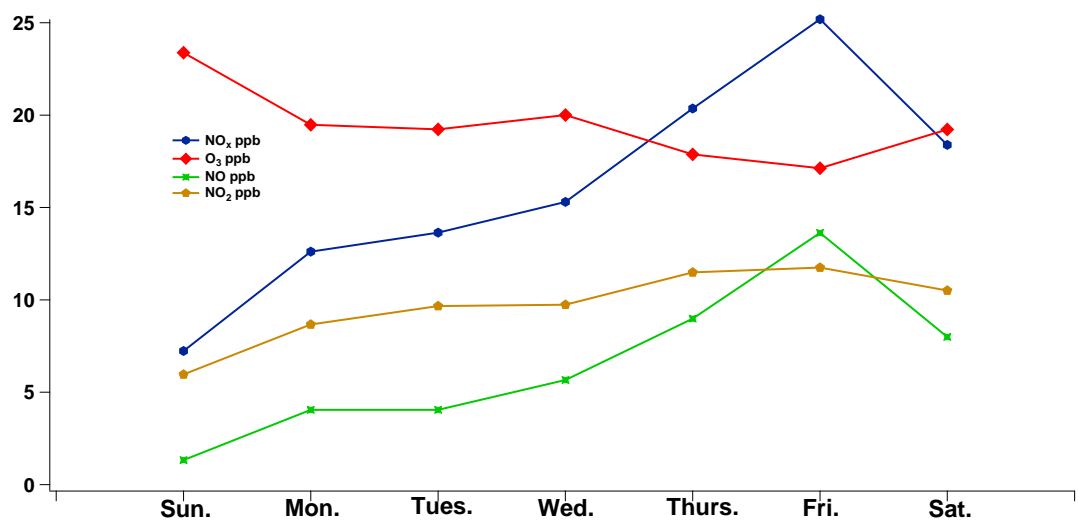

**Figure 3.** (a) Weekly variation for ozone (red line), nitrogen dioxide (orange line), nitric oxide (green line), nitrogen oxides (blue line), computed for the cold season between 1 December 2017–4 March 2018.

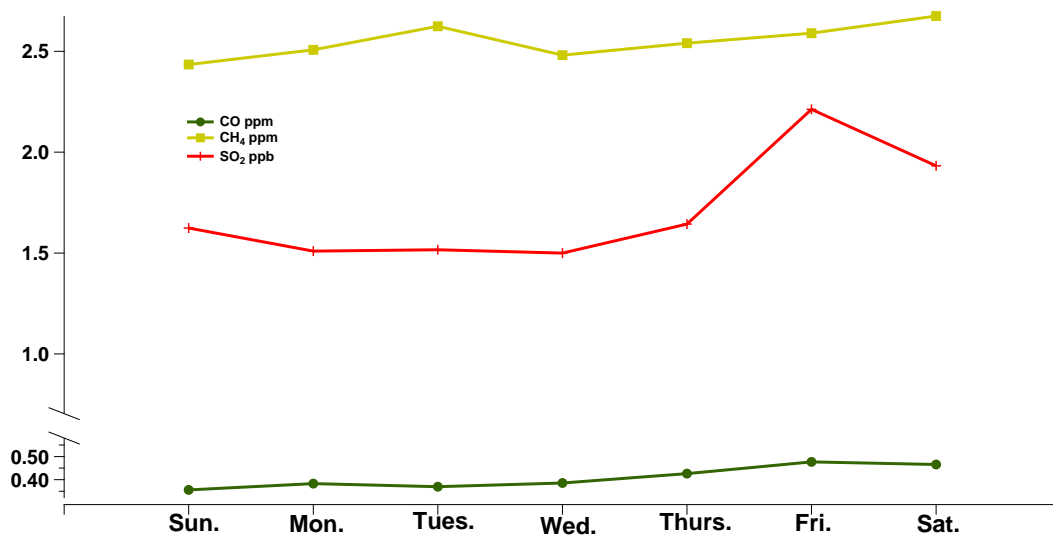

**Figure 4.** (a) Weekly variation for sulphur dioxide (red line), carbon monoxide (green line) and methane (yellow line), computed for the cold season between 1 December 2017–4 March 2018.

1      © 2019 by the authors. Submitted to *Atmosphere* for possible open access publication  
2 under the terms and conditions of the Creative Commons Attribution (CC BY) license  
3 (<http://creativecommons.org/licenses/by/4.0/>).
